# Supplementary material for: Inhibition of mTOR-kinase destabilizes MYCN and is a potential therapy for MYCN-dependent tumors
Source: PubMed Central journal article supplement (PMC5295370; doi:10.18632/oncotarget.10544), 2016-07-12
Supplement: oncotarget-07-57525-s001.pdf [file oncotarget-07-57525-s001.pdf]

# Inhibition of mTOR-kinase destabilizes MYCN and is a potential therapy for MYCN-dependent tumors

## Supplementary Material

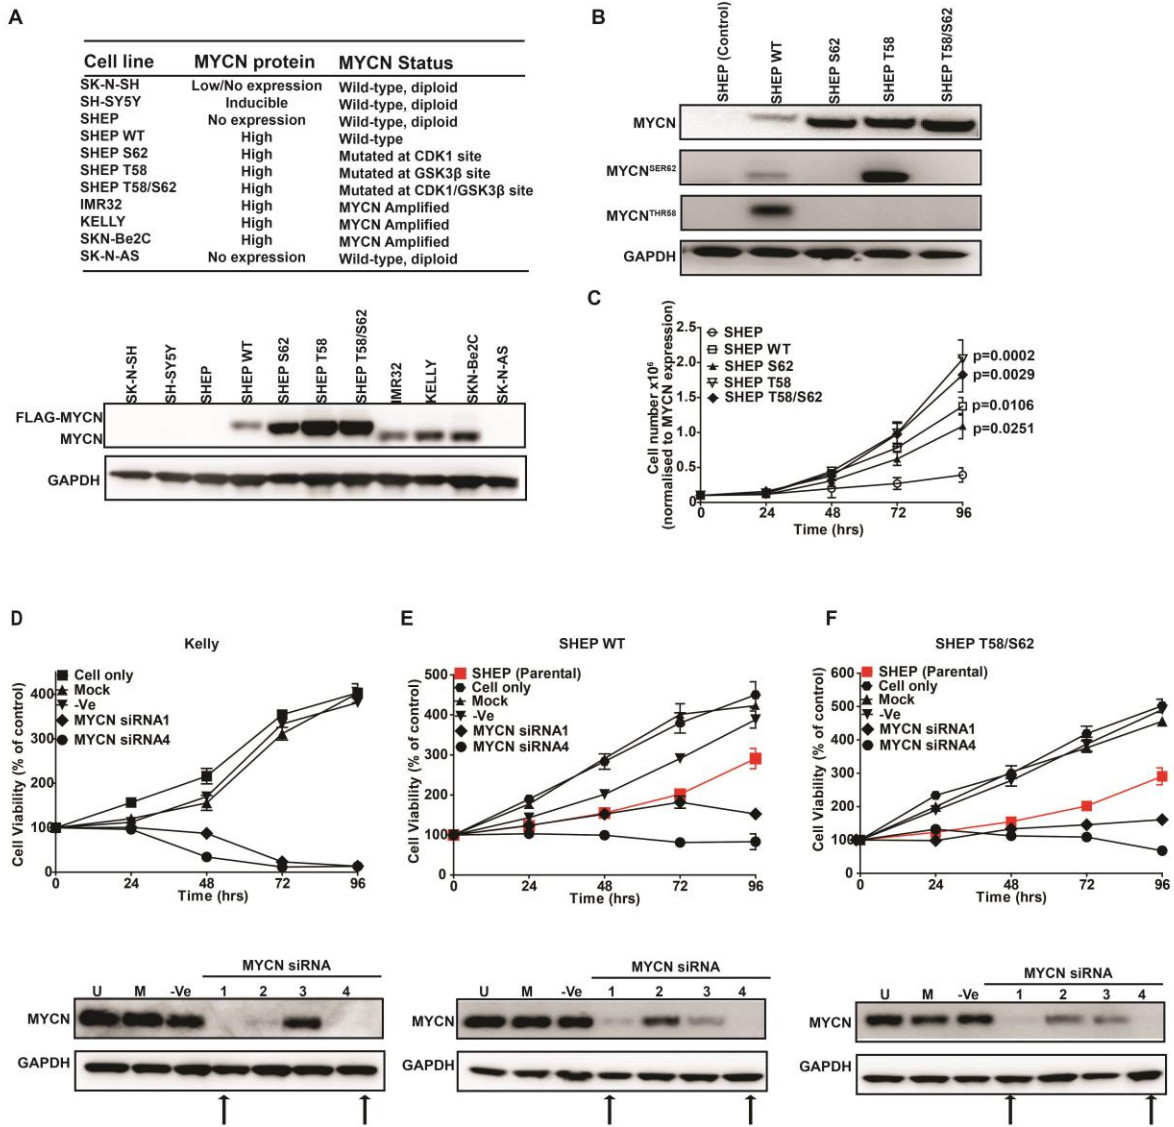

**Figure S1: Identification of PI3K/mTOR inhibitors that selectively target MYCN.**

**A.** Description and MYCN protein expression of a panel of neuroblastoma cell lines representing a spectrum of MYCN protein expression and/ or engineered to stably express murine MYCN constructs wild-type or mutated at critical phospho-residues. **B.** Western blotting analysis of

MYCN, MYCN<sup>SER62</sup> MYCN<sup>THR58</sup> protein levels in SHEP NB cells expressing murine MYCN wild-type or mutated at T58/S62 phospho-residues. **C.** Cell growth as determined by the Trypan blue exclusion method over a time course of 96 h in parental SHEP and SHEP MYCN phosphomutant cell lines. Depletion of MYCN selectively reduces cell viability of Kelly, SHEP WT and SHEP T58/S62 NB cells. **D-F.** Kelly SHEP-WT and SHEP T58/S62 NB cells were mock transfected with Lipofectamine 2000 (M), transfected with 100nM of non-targeting siRNA (-Ve), or with multiple MYCN targeting siRNA (100nM) and cell viability and MYCN expression levels determined by Trypan blue exclusion assay and immunoblotting respectively. Values represent the averages of three independent assays. Error bars; standard deviation.

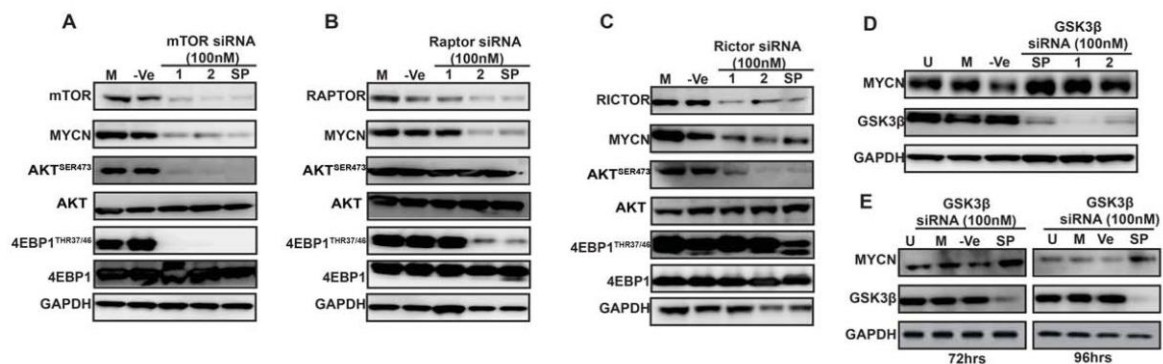

**Figure S2: Effective targeting of MYCN stability requires mTOR inhibition.**

Knockdown of mTOR RAPTOR and RICTOR destabilizes MYCN and modulates TORC1/2 targets in Kelly NB cells. **A.** Kelly NB cells were mock transfected with Lipofectamine 2000 (M), transfected with 100nM of non-targeting siRNA (-Ve), with 2 independent mTOR targeting siRNA (100nM) or with 4 pooled mTOR targeting siRNA (100nM) and protein levels of MYCN, mTOR, AKT<sup>SER473</sup>, and 4EBP1<sup>THR37/46</sup> was assessed by western blot analysis. **B.** Kelly NB cells were mock transfected with Lipofectamine 2000 (M), transfected with 100nM of non-targeting siRNA (-Ve), with 2 independent RAPTOR targeting siRNA (100nM) or with 4 pooled

RAPTOR targeting siRNA (100nM) and protein levels of MYCN, RAPTOR, AKT<sup>SER473</sup>, and 4EPB1<sup>THR37/46</sup> was assessed by western blot analysis. **C.** Kelly NB cells were mock transfected with Lipofectamine 2000 (M), transfected with 100nM of non-targeting siRNA (-Ve), with 2 independent RICTOR targeting siRNA (100nM) or with 4 pooled RICTOR targeting siRNA (100nM) and protein levels of MYCN, RICTOR, AKT<sup>SER473</sup>, and 4EPB1<sup>THR37/46</sup> was assessed by western blot analysis. **D.** GSK3 $\beta$  modulation is rate-limiting for MYCN destabilization. Kelly NB cells were mock transfected with Lipofectamine 2000 (M), transfected with 100nM of non-targeting siRNA (-Ve), with 2 independent GSK3 $\beta$  targeting siRNA (100nM) or with 4 pooled GSK3 $\beta$  targeting siRNA (100nM) and protein levels of MYCN and GSK3 $\beta$  was assessed by western blot analysis. **E.** Western blot analysis of MYCN levels at 72 and 96 h post GSK3 $\beta$  depletion. Kelly cells were; untreated (U), mock transfected with Lipofectamine 2000 (M), transfected with 100nM of non-targeting siRNA (-Ve), or 100nM pooled GSK3 $\beta$  siRNA and protein levels assessed via western blotting.

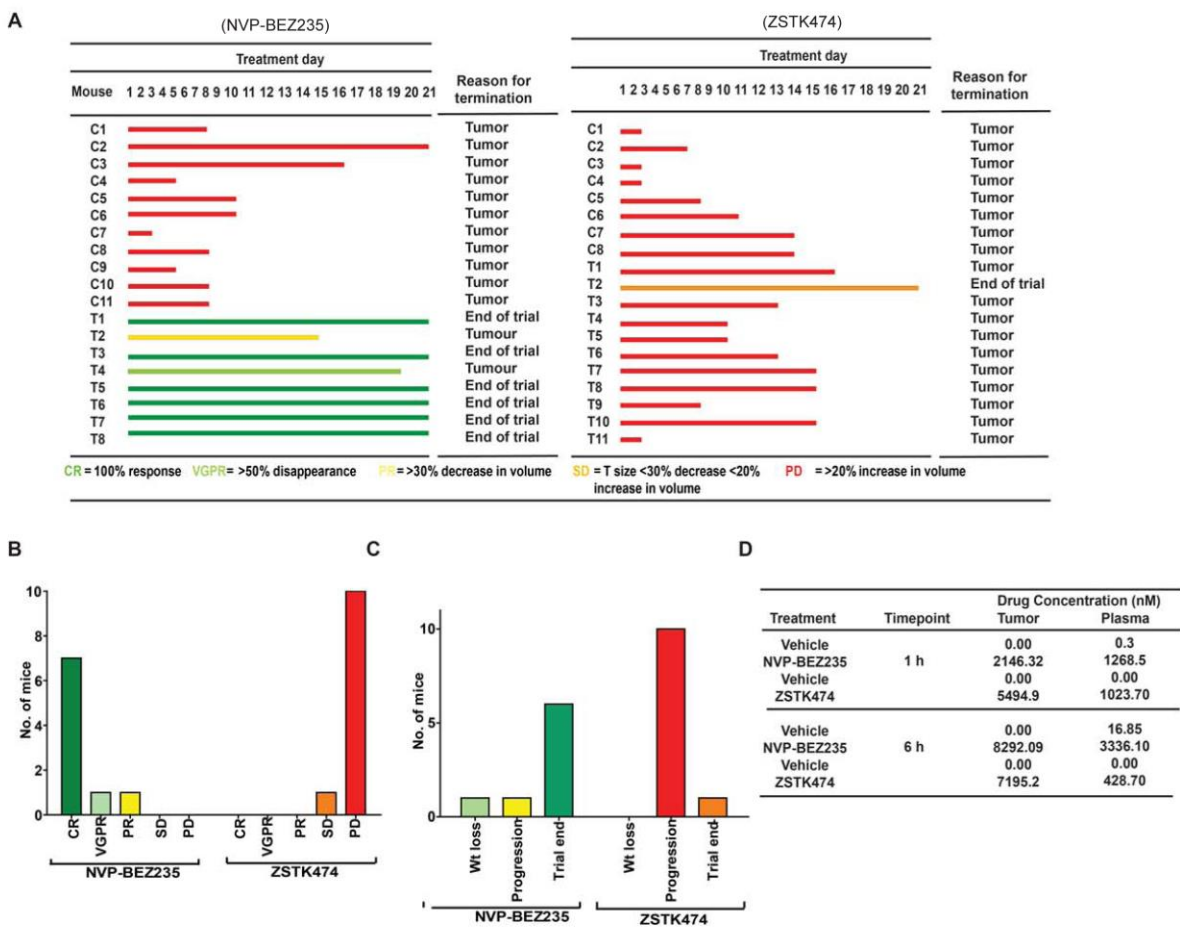

**Figure S3: PI3K/mTOR inhibition is effective against MYC-driven transgenic tumors.**

Tumor-bearing animals transgenic for TH-*MYCN* were treated daily using oral gavage with 45mg/kg NVP-BE235 (n=8), NVP-BE235 vehicle (n=11), 400mg/kg ZSTK474 (n=11) or ZSTK474 vehicle (n=8). Treatment was for an average of 21 days, at which time the animals were killed. **A.** RECIST assessment of response of the individual animals from Fig 6 to NVP-BE235 (left panel) or ZSTK474 (right panel). **B.** Summary of RECIST response of animals. **C.** Summary of toxicity of NVP-BE235 or ZSTK474 in comparison to vehicle. **D.** Pharmacokinetic analysis of NVP-BE235 and ZSTK474 inhibitor levels in tumor tissue and plasma.

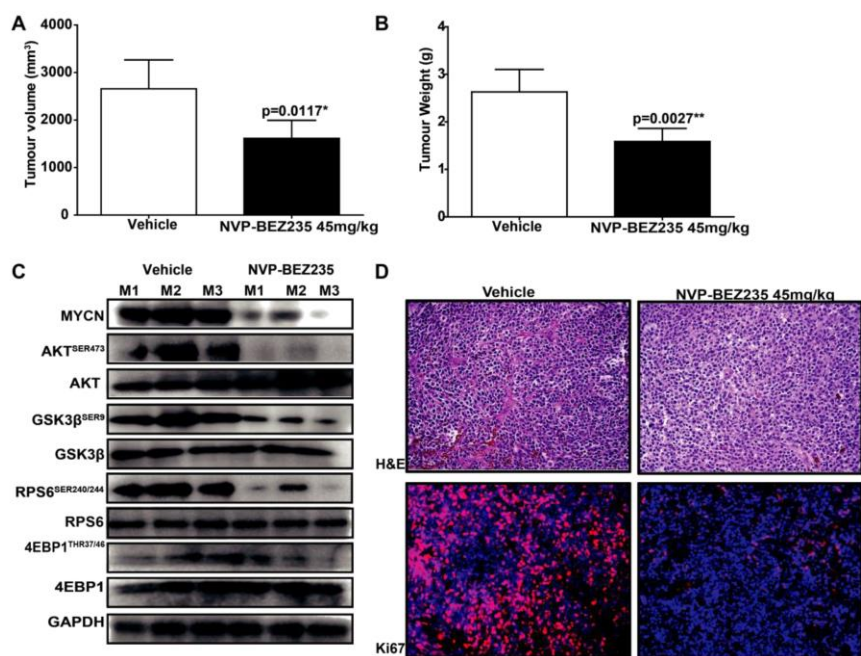

**Figure S4: PI3K/mTOR inhibition is effective against MYC-driven orthotopic tumors.**

A human *MYCN*-amplified primary tumor designated SFNB-08 was obtained from a patient with high-grade neuroblastoma that had been previously treated with cyclophosphamide, topotecan, cisplatin, etoposide, doxorubicin, and vincristine. Tumor pieces (4mm<sup>3</sup>) were implanted into the kidney capsule of nude mice. After 7 days, mice were treated with either vehicle PEG300 control or NVP-BEZ235 (45mg/kg in PEG300) daily for 14 days. Tumors were collected on the last day of treatment, their weight and volume (as measured by digital caliper) recorded and tissues taken for histopathology and western blotting. **A.** Average volume (mm<sup>3</sup>) of resected tumors from either NVP-BEZ235 or vehicle control treated animals **B.** Average weight (g) of resected tumors from either NVP-BEZ235 or vehicle control treated animals. **C.** Western blot analysis of tumors treated with NVP-BEZ235 or vehicle control. M1-M5 indicates tumor samples from cohorts of 5 individual animals, treated with either NVP-BEZ235 or vehicle control. **D.** Tumor pathology (Hematoxylin & Eosin) and immunochemical staining (cl. Casp. 3) for vehicle (left panels) and NVP-BEZ235 treated (right panels) tumors. (White arrows = vascularization).

## Supplementary table legends

**Table S1: Published IC<sub>50</sub> for small molecule PI3K/mTOR inhibitors**

| Inhibitor  | IC50 (nM)     |              |               |               |       |       |        |        |
|------------|---------------|--------------|---------------|---------------|-------|-------|--------|--------|
|            | PI3K $\alpha$ | PI3K $\beta$ | PI3K $\gamma$ | PI3K $\delta$ | Torc1 | Torc2 | mTOR   | DNA-PK |
| LY294002   | 500           | 580          | 12            | 600           | -     | -     | -      | -      |
| ZSTK474    | 16            | 44           | 49            | 4.6           | -     | -     | >10000 | -      |
| PIK90      | 11            | 350          | 18            | 58            | -     | -     | 1      | 13     |
| PI-103     | 2             | 3            | 15            | 3             | 20    | 83    | 20     | 2      |
| TGX221     | 5000          | 5            | 3500          | 100           | -     | -     | -      | -      |
| Torin1     | -             | -            | 1800          | -             | 10    | 10    | 10     | -      |
| Rapamycin  | -             | -            | -             | -             | -     | -     | -      | -      |
| NVP-BEZ235 | 4             | 75           | 5             | 7             | 10    | 10    | 10     | -      |

- Including PI3K-p110 isoforms and mTOR complex components (Jackson et al., 2005; Kong and Yamori, 2007; Liu et al., 2010; Maira et al., 2008; Raynaud et al., 2009; Yaguchi et al., 2006)

**Table S2: Treatment of NB cell lines with a panel of PI3K/mTOR pathway inhibitors**

| Cell line    | MYCN Expression | MYCN Status   | TGX221      | PIK90       | Rapamycin    | ZSTK474      | Torin1      | NVP-BE235    |
|--------------|-----------------|---------------|-------------|-------------|--------------|--------------|-------------|--------------|
| Kelly        | High            | Wild-type     | 1.03+/-0.04 | 0.33+/-0.03 | 8.83+/-0.82  | 0.32+/-0.03  | 0.04+/-0.01 | 0.05+/-0.01  |
| IMR32        | High            | Wild-type     | 0.23+/-0.02 | 0.41+/-0.02 | 12.39+/-0.18 | 0.27+/-0.12  | 0.78+/-0.01 | 0.062+/-0.01 |
| SKN-Be2C     | High            | Wild-type     | 0.78+/-0.22 | 0.18+/-0.07 | 13.13+/-0.15 | 0.39+/-0.04  | 0.19+/-0.06 | 0.038+/-0.03 |
| IMR5         | High            | Wild-type     | 0.75+/-0.19 | 0.56+/-0.06 | 12.91+/-0.15 | 0.29+/-0.10  | 0.15+/-0.09 | 0.071+/-0.02 |
| SH-SY5Y      | Inducible       | Wild-type     | 1.95+/-0.32 | 1.64+/-0.19 | 10.31+/-0.67 | 0.79+/-0.06  | 0.42+/-0.51 | 0.49+/-0.035 |
| SK-N-SH      | Low             | Wild-type     | 1.87+/-0.11 | 0.97+/-0.18 | 10.29+/-0.81 | 0.98+/-0.14  | 1.34+/-0.05 | 0.42+/-0.04  |
| SHEP-WT      | High            | Wild-type     | 2.25+/-0.21 | 0.92+/-0.03 | 10.72+/-0.62 | 0.51+/-0.041 | 0.2+/-0.01  | 0.18+/-0.028 |
| SHEP-S62     | High            | CDK1 mut      | 2.84+/-0.07 | 2.03+/-0.07 | 11.01+/-0.23 | 3.87+/-0.54  | 1.89+/-0.31 | 1.18+/-0.31  |
| SHEP-T58     | High            | GSK3 mut      | 1.97+/-0.07 | 1.93+/-0.04 | 10.46+/-0.18 | 3.53+/-0.25  | 2.03+/-0.12 | 1.21+/-0.14  |
| SHEP-T58/S62 | High            | CDK1/GSK3 mut | 2.63+/-0.05 | 4.93+/-0.21 | 12.93+/-0.72 | 6.03+/-0.87  | 2.36+/-0.07 | 1.88+/-0.51  |
| SHEP         | No expression   | No Mycn       | 4.91+/-0.14 | 3.92+/-0.31 | 11.23+/-0.54 | 2.87+/-0.48  | 1.23+/-0.12 | 3.52+/-0.27  |
| SK-N-AS      | No expression   | No Mycn       | 0.23+/-0.24 | 0.79+/-0.11 | 14.91+/-0.28 | 1.23+/-0.35  | 2.21+/-0.38 | 0.41+/-0.24  |

Cell viability 72h post treatment as determined by SRB assay for an isogenic panel of NB cell lines expressing varying levels of MYCN or phospho-stabilized MYCN proteins. Values are mean 72h GI<sub>50</sub> derived from three independent assays. Errors are standard deviations. Cells engineered to express MYCN (SHEP-WT), phospho-mutated MYCN (SHEP-T58/S62) or native MYCN amplified cells with high MYCN protein levels are boxed.
